# Supplementary material for: HAMMER: automated operation of mass frontier to construct in silico mass spectral fragmentation libraries
Source: PubMed Central journal article supplement (PMC3928522; doi:10.1093/bioinformatics/btt711), 2013-12-11
Supplement: supp_btt711_Bioinformatics_AppNote_Suppl_Info_rev_211113.pdf [file supp_btt711_Bioinformatics_AppNote_Suppl_Info_rev_211113.pdf]

---

# HAMMER: Automated operation of Mass Frontier to construct *in-silico* mass spectral fragmentation libraries

Jiarui Zhou<sup>1,†</sup>, Ralf J. M. Weber<sup>2,†</sup>, J. William Allwood<sup>2</sup>, Robert Mistrik<sup>4</sup>, Zexuan Zhu<sup>5</sup>, Zhen Ji<sup>5</sup>, Siping Chen<sup>6</sup>, Warwick B. Dunn<sup>2</sup>, Shan He<sup>3</sup> and Mark R. Viant<sup>2,\*</sup>

<sup>1</sup>College of Biomedical Engineering and Instrument Science, Zhejiang University, Hangzhou 310027, China; <sup>2</sup>School of Biosciences and <sup>3</sup>School of Computer Science, University of Birmingham, Birmingham, B15 2TT, United Kingdom; <sup>4</sup>HighChem, Ltd., Leskova 11, 81104 Bratislava, Slovakia; <sup>5</sup>Shenzhen City Key Laboratory of Embedded System Design, College of Computer Science and Software Engineering, <sup>6</sup>School of Medicine, Shenzhen University, Shenzhen 518060, China;

<sup>†</sup>To whom correspondence should be addressed, <sup>†</sup>These authors made an equal contribution to this work.

---

**Table S1:** Mass Frontier parameters used to conduct automated *in-silico* fragmentation.

|                          |                                                                                        |
|--------------------------|----------------------------------------------------------------------------------------|
| <b>Knowledge base</b>    | General fragmentation rules, HighChem ESI Pos 2008* and HighChem Fragmentation Library |
| <b>Reaction steps</b>    | 7**                                                                                    |
| <b>Reactions limit</b>   | 20,000**                                                                               |
| <b>Ionisation method</b> | [M + H] <sup>+</sup>                                                                   |

\* Includes the most prescribed drugs in Europe. This spectral library was manually annotated with the intention to improve the prediction for most common drugs.

\*\* See online user manual section 3.2.2 for more details.

**Table S2:** Summary of *in-silico* fragmentation results for the two datasets presented more exhaustively in Tables S3 and S4.

| Case Study                                 | No. of Compounds | Unique Structures | Fragments Produced | Run Time (Sec) | Failed |
|--------------------------------------------|------------------|-------------------|--------------------|----------------|--------|
| Phenylalanine metabolism KEGG pathway      | 72               | 72                | 232618             | 29871          | 1*     |
| Top 200 prescribed drugs in USA in 2011*** | 200              | 151               | 489300             | 52459          | 3**    |

\* No fragment(s) can be generated for compound KGID\_C00084.

\*\* No fragment(s) can be generated for compound CSID\_54768, CSID\_7843322, and CSID\_5293370.

\*\*\* Some compounds contain more than one molecule, and will be split automatically. Lower mass neutral, charged molecules, and single elements were removed. If a molecule is exported from more than one compound, only one of them will be fragmented. The molecules will be verified using InChI, and, if no error can be found, exported in MOL format. Finally 151 qualified MOL files were sent to Mass Frontier for *in-silico* fragmentation. Validation steps described here are conducted automatically in HAMMER.

**Table S3:** Case study I: Compounds present in the phenylalanine metabolism KEGG pathway

| Name                             | Unique identifier<br>KEGG ID | Run Time<br>(sec) |
|----------------------------------|------------------------------|-------------------|
| Pyruvate                         | KGID_C00022                  | 107               |
| Acetyl-CoA                       | KGID_C00024                  | 756               |
| Succinate                        | KGID_C00042                  | 191               |
| L-Phenylalanine                  | KGID_C00079                  | 322               |
| L-Tyrosine                       | KGID_C00082                  | 390               |
| Malonyl-CoA                      | KGID_C00083                  | 656               |
| Acetaldehyde                     | KGID_C00084                  | 21                |
| Succinyl-CoA                     | KGID_C00091                  | 614               |
| Fumarate                         | KGID_C00122                  | 107               |
| 4-Hydroxybenzoate                | KGID_C00156                  | 79                |
| Phenylpyruvate                   | KGID_C00166                  | 200               |
| Benzoate                         | KGID_C00180                  | 71                |
| p-Coumaroyl-CoA                  | KGID_C00223                  | 994               |
| Caffeoyl-CoA                     | KGID_C00323                  | 999               |
| Feruloyl-CoA                     | KGID_C00406                  | 946               |
| trans-Cinnamate                  | KGID_C00423                  | 239               |
| S-Benzoate                       | KGID_C00512                  | 836               |
| Phenylacetyl-CoA                 | KGID_C00582                  | 835               |
| 2-Hydroxy-2,4-pentadienoate      | KGID_C00596                  | 161               |
| Phenylacetaldehyde               | KGID_C00601                  | 122               |
| 2-Methylpropanoyl-CoA            | KGID_C00630                  | 736               |
| 4-Hydroxyphenylacetate           | KGID_C00642                  | 246               |
| 4-Hydroxy-3-methoxy-benzaldehyde | KGID_C00755                  | 160               |
| Salicylate                       | KGID_C00805                  | 111               |
| 4-Coumarate                      | KGID_C00811                  | 248               |
| 3-(2-Hydroxyphenyl)propanoate    | KGID_C01198                  | 384               |
| Ephedrine                        | KGID_C01575                  | 371               |
| Hippurate                        | KGID_C01586                  | 336               |
| trans-2-Hydroxycinnamate         | KGID_C01772                  | 279               |
| alpha-Oxo-benzeneacetic          | KGID_C02137                  | 112               |
| 3-Oxoadipyl-CoA                  | KGID_C02232                  | 709               |
| D-Phenylalanine                  | KGID_C02265                  | 414               |
| 2-Phenylacetamide                | KGID_C02505                  | 131               |
| 2-Hydroxy-3-phenylpropenoate     | KGID_C02763                  | 256               |
| (+)-Pseudoephedrine              | KGID_C02765                  | 369               |

|                                                      |             |      |
|------------------------------------------------------|-------------|------|
| N-Acetyl-L-phenylalanine                             | KGID_C03519 | 441  |
| 4-Hydroxy-2-oxopentanoate                            | KGID_C03589 | 399  |
| 3-(2,3-Dihydroxyphenyl)propanoate                    | KGID_C04044 | 410  |
| Phenylacetylglutamine                                | KGID_C04148 | 433  |
| (R)-2-Methylimino-1-phenylpropan-1-ol                | KGID_C04351 | 327  |
| 2-Hydroxy-6-oxonona-2,4-diene-1,9-dioate             | KGID_C04479 | 399  |
| Phenethylamine                                       | KGID_C05332 | 103  |
| 3-Hydroxyphenylacetate                               | KGID_C05593 | 250  |
| Phenylacetyl glycine                                 | KGID_C05598 | 408  |
| Phenyllactate                                        | KGID_C05607 | 323  |
| N-Acetyl-D-phenylalanine                             | KGID_C05620 | 434  |
| Phenylpropanoate                                     | KGID_C05629 | 226  |
| 2-Hydroxyphenylacetate                               | KGID_C05852 | 199  |
| Phenylethyl                                          | KGID_C05853 | 111  |
| 2,6-Dihydroxyphenylacetate                           | KGID_C06207 | 190  |
| Capsaicin                                            | KGID_C06866 | 122  |
| Phenylacetic                                         | KGID_C07086 | 141  |
| 4-Hydroxy-3-methoxyphenyl-beta-hydroxypropanoyl-CoA  | KGID_C07303 | 1360 |
| D-Cathine                                            | KGID_C08300 | 308  |
| D-Cathinone                                          | KGID_C08301 | 178  |
| 3-(3-Hydroxyphenyl)propanoic                         | KGID_C11457 | 420  |
| cis-3-(Carboxy-ethyl)-3,5-cyclo-hexadiene-1,2-diol   | KGID_C11588 | 387  |
| trans-3-Hydroxycinnamate                             | KGID_C12621 | 267  |
| cis-3-(3-Carboxyethenyl)-3,5-cyclohexadiene-1,2-diol | KGID_C12622 | 411  |
| trans-2,3-Dihydroxycinnamate                         | KGID_C12623 | 386  |
| 2-Hydroxy-6-ketononatrienedioate                     | KGID_C12624 | 488  |
| 5-Carboxy-2-pentenoyl-CoA                            | KGID_C14144 | 681  |
| (3S)-3-Hydroxyadipyl-CoA                             | KGID_C14145 | 759  |
| Phenylglyoxylyl-CoA                                  | KGID_C15524 | 933  |
| Vanillylamine                                        | KGID_C16666 | 127  |
| (-)-Norephedrine                                     | KGID_C16719 | 257  |
| Pyruvophenone                                        | KGID_C17268 | 169  |
| 8-Methyl-6-nonenoic                                  | KGID_C18202 | 351  |
| 3-Oxo-5,6-dehydrosuberyl-CoA                         | KGID_C19945 | 815  |
| 3-Oxo-5,6-dehydrosuberyl-CoA                         | KGID_C19946 | 874  |
| 2-Oxepin-2(3H)-ylideneacetyl-CoA                     | KGID_C19975 | 853  |
| 2-(1,2-Epoxy-1,2-dihydrophenyl)acetyl-CoA            | KGID_C20062 | 723  |

**Table S4:** Case study II: Top 200 prescribed drugs in USA in 2011

| Name                          | Unique Identifier<br>ChemSpider | Unique<br>Structures | Run Time* (sec) |
|-------------------------------|---------------------------------|----------------------|-----------------|
| Abilify                       | CSID_54790                      | 1                    | 544             |
| Actos                         | CSID_54590                      | 2                    | 513             |
| Advair Diskus                 | CSID_7987322                    | 2                    | 778             |
| Albuterol                     | CSID_1999                       | 1                    | 439             |
| Allopurinol                   | CSID_2010                       | 1                    | 52              |
| Alprazolam                    | CSID_2034                       | 1                    | 96              |
| Amitriptyline HCl             | CSID_10594                      | 2                    | 460             |
| Amlodipine Besylate           | CSID_54537                      | 2                    | 579             |
| Amoxicillin                   | CSID_31006                      | 1                    | 601             |
| Amphetamine Salts             | CSID_13852819                   | 1                    | 99              |
| Atenolol                      | CSID_2162                       | 1                    | 416             |
| Azithromycin                  | CSID_10482163                   | 1                    | 465             |
| Bactrim                       | CSID_318412                     | 2                    | 154             |
| Benicar                       | CSID_115748                     | 1                    | 738             |
| Benicar HCT                   | CSID_139674                     | 1                    | 530             |
| Boceprevir                    | CSID_8499830                    | 1                    | 501             |
| Buprenorphine HCl             | CSID_2297864                    | 2                    | 568             |
| Bystolic                      | CSID_8108633                    | 2                    | 501             |
| Carisoprodol                  | CSID_2478                       | 1                    | 250             |
| Carvedilol                    | CSID_2487                       | 1                    | 111             |
| Celebrex                      | CSID_2562                       | 1                    | 111             |
| Celexa                        | CSID_70381                      | 2                    | 379             |
| Cephalexin                    | CSID_25541                      | 1                    | 531             |
| Cheratussin AC                | CSID_56541                      | 1                    | 59              |
| Cheratussin AC                | CSID_58641                      | 1                    | 697             |
| Cialis                        | CSID_99301                      | 1                    | 694             |
| Ciprofloxacin HCl             | CSID_56700                      | 3                    | 459             |
| Clindamycin HCl               | CSID_10482112                   | 2                    | 344             |
| Codeine Sulfate               | CSID_2341112                    | 2                    | 506             |
| Crestor                       | CSID_4445607                    | 3                    | 234             |
| Cyclobenzaprine Hydrochloride | CSID_21168                      | 2                    | 313             |
| Cymbalta                      | CSID_54822                      | 1                    | 369             |
| Diazepam                      | CSID_2908                       | 1                    | 282             |
| Digoxin                       | CSID_2006532                    | 1                    | 397             |
| Diovan                        | CSID_54833                      | 1                    | 459             |
| Diovan HCT                    | CSID_7986336                    | 2                    | 543             |
| Dyazide                       | CSID_56657                      | 2                    | 152             |

|                       |               |   |      |
|-----------------------|---------------|---|------|
| Efexor                | CSID_56641    | 2 | 354  |
| Enalapril Maleate     | CSID_21112356 | 2 | 522  |
| Endocet/Oxycontin     | CSID_4447649  | 1 | 493  |
| Famotidine            | CSID_3208     | 1 | 326  |
| Flovent HFA           | CSID_392059   | 1 | 427  |
| Fluconazole           | CSID_3248     | 1 | 164  |
| Fluoxetine HCl        | CSID_56589    | 2 | 375  |
| Folic Acid            | CSID_5815     | 1 | 562  |
| Furosemide            | CSID_3322     | 1 | 502  |
| Gabapentin            | CSID_3328     | 1 | 308  |
| Glipizide             | CSID_3359     | 1 | 584  |
| Glyburide             | CSID_3368     | 1 | 828  |
| Hydrochlorothiazide   | CSID_3513     | 1 | 115  |
| Ibuprofen (Rx)        | CSID_3544     | 1 | 408  |
| Januvia               | CSID_4953630  | 2 | 460  |
| Levaquin              | CSID_131410   | 1 | 714  |
| Levothyroxine Sodium  | CSID_56705    | 2 | 63   |
| Lexapro               | CSID_10616991 | 2 | 416  |
| Lidoderm              | CSID_3548     | 1 | 415  |
| Lisinopril            | CSID_4514932  | 3 | 417  |
| Loestrin 24 Fe        | CSID_5770     | 1 | 414  |
| Lorazepam             | CSID_3821     | 1 | 422  |
| Losartan Potassium    | CSID_54768    | 2 | 22   |
| Lovastatin            | CSID_48085    | 1 | 358  |
| Lovaza                | CSID_8007146  | 2 | 712  |
| Lyrica                | CSID_4589156  | 1 | 340  |
| Meloxicam             | CSID_10442740 | 1 | 386  |
| Metformin HCl         | CSID_13583    | 2 | 95   |
| Methylprednisolone    | CSID_6485     | 1 | 400  |
| Metoprolol Succinate  | CSID_56654    | 3 | 928  |
| Metoprolol Succinatee | CSID_4027     | 1 | 404  |
| Metoprolol Tartrate   | CSID_390070   | 3 | 1058 |
| Naloxone HCl          | CSID_4576530  | 2 | 468  |
| Namenda               | CSID_157849   | 2 | 113  |
| Naproxen              | CSID_137720   | 1 | 220  |
| Nasonex               | CSID_390091   | 1 | 440  |
| Nexium                | CSID_7843322  | 3 | 42   |
| Niaspan               | CSID_913      | 1 | 10   |
| Nuvaring              | CSID_8136308  | 2 | 775  |
| Omeprazole (Rx)       | CSID_4433     | 1 | 266  |
| Oxycodone HCl         | CSID_4575389  | 2 | 479  |

|                         |               |    |      |
|-------------------------|---------------|----|------|
| Pantoprazole Sodium     | CSID_5293370  | 2  | 21   |
| Paroxetine HCl          | CSID_23089260 | 2  | 439  |
| Penicillin VK           | CSID_8286     | 2  | 58   |
| Percocet                | CSID_4881971  | 3  | 639  |
| Plavix                  | CSID_54632    | 1  | 430  |
| Pravastatin Sodium      | CSID_49400    | 2  | 142  |
| Prednisone              | CSID_5656     | 1  | 415  |
| Prednisone              | CSID_4642486  | 1  | 379  |
| Premarin                | CSID_9532     | 2  | 52   |
| Premarin                | CSID_570974   | 2  | 54   |
| Proair HFA              | CSID_36448    | 3  | 850  |
| Promethazine HCl        | CSID_5792     | 2  | 128  |
| Risperidone             | CSID_4895     | 1  | 551  |
| Seroquel                | CSID_4444493  | 3  | 1017 |
| Simvastatin             | CSID_49179    | 1  | 363  |
| Singulair               | CSID_4444508  | 2  | 52   |
| Spiriva Handihaler      | CSID_10482095 | 2  | 356  |
| Symbicort               | CSID_36566    | 1  | 443  |
| Tamsulosin HCl          | CSID_4515016  | 2  | 143  |
| Tramadol HCl            | CSID_56711    | 2  | 398  |
| Trazodone HCl           | CSID_56652    | 2  | 387  |
| Triamcinolone Acetonide | CSID_6196     | 1  | 429  |
| Tricor                  | CSID_3222     | 1  | 460  |
| Tri-Sprintec / TriNessa | PCID_9571023  | 2  | 788  |
| Viagra                  | CSID_56586    | 2  | 955  |
| Vicodin                 | CSID_4576477  | 3  | 766  |
| Vicodin                 | CSID_4677998  | 3  | 900  |
| Vicodin                 | CSID_4881954  | 10 | 1671 |
| Vicodin                 | CSID_21230266 | 3  | 923  |
| Vitamin D (Rx)          | CSID_4444353  | 1  | 360  |
| Vytorin                 | CSID_8008151  | 2  | 981  |
| Vyvanse                 | CSID_9772457  | 3  | 321  |
| Warfarin Sodium         | CSID_10442445 | 1  | 564  |
| Zantac                  | CSID_43590    | 2  | 375  |
| Zestoretic              | CSID_21106405 | 2  | 497  |
| Zetia                   | CSID_132493   | 1  | 652  |
| Zolpidem Tartrate       | CSID_390093   | 3  | 1129 |
| Zyprexa                 | CSID_10442212 | 1  | 318  |

\* The run time is the total time to perform *in-silico* fragmentation on all the unique structures of the corresponding drug.

## Spectral Matching Using the Modified pMatch Algorithm (Ye, et al., 2010)

The pMatch algorithm, utilizing a novel probability based model to score spectral comparison, is reported to obtain better identification performance than conventional methods. The original algorithm is designed for mass spectrometry based protein identification. In this work we propose a modified pMatch algorithm.

### 1. Preprocessing

A series of preprocessing filters are applied before spectral matching: Intensity value filter removes peaks that have a relative intensity smaller than a given threshold; Intensity number filter retains a given number of the most intensive peaks; Isotope filter removes isotopic peaks. Preprocessing helps the algorithm to improve matching accuracy and reduce computational time.

### 2. Peak Matching

The original pMatch algorithm takes two types of peak matching into account: S1 denotes accurate matching, and S2 denotes matching with mass shifts referring to the precursor ion mass difference. The precursor mass difference, caused by peptides with unusual post-translational modifications (PTMs), is not relevant for metabolomics. In the modified pMatch algorithm only the accurate peak matching is therefore considered.

Before matching, the precursor ion mass of the real spectrum is compared to that of each compound in the *in-silico* library. Compounds with precursor mass difference smaller than a given tolerance  $T_p$  are retained in a candidate set  $C$  for further matching and scoring.

$$C = \{in-silico \text{ compound } c_i \text{ with precursor } m/z \text{ value } m_p: |m_p - m_R| < T_p\}$$

where  $c_i$  is the  $i$ th compound in the *in-silico* library, and  $m_R$  is the precursor ion mass of the real spectrum. Peaks in the real spectrum are sorted in the descending order of their intensities, and determine their hits in each candidate compound. The peak hits in candidate compound  $c_i$  are:

$$S_i = \{in-silico \text{ peaks in } c_i \text{ with } m/z \text{ value } m_L: |m_L - m_Q| < T_p\}, c_i \in C$$

in which  $m_Q$  is the  $m/z$  value of the explained real peak. Each peak in a candidate *in-silico* compound can only be matched at most once.

### 3. Similarity Scoring

In the modified pMatch algorithm, three sub-scores are employed to measure the spectral similarity: (1) spectral dot-product score (SDP\_Score), (2) probability-based score (P\_Score), and (3) matching distance score (MD\_Score). These sub-scores and the overall similarity score are calculated for each candidate *in-silico* compound.

(1) **SDP\_Score**: the SDP\_Score for candidate compound  $c_i$  is calculated using the following equation:

$$SDP\_Score = \frac{\sum_{peaks\_in\_S_i} I_Q \times I_L}{\sqrt{\sum_{real\_peaks} I_Q^2} \times \sqrt{\sum_{in-silico\_peaks} I_L^2}}$$

where  $I_Q$  and  $I_L$  are the intensities of real and *in-silico* peaks respectively, and  $peaks\_in\_S_i$  denotes the *in-silico* peaks in hits set  $S_i$ . Intensity values for all the *in-silico* peaks are set to 100 (maximum relative intensity value of the real spectrum).

(2) **P\_Score**: in pMatch algorithm, peaks in real spectrum with intensity values no less than 5% of the most intensive peak are defined as the capital peaks, and the mighty hits are matches between the capital peaks and the explained *in-silico* peaks. The global average probability of a mighty hit is defined as:

$$p = \frac{\sum_{i=1}^{C_{max}} k_i / n}{\sum_{i=1}^{C_{max}} m_i}$$

where  $n$  is the number of capital peaks in real spectrum, variables  $k_i$  and  $m_i$  are the numbers of mighty hits and all the hits in candidate compound  $c_i$  respectively, and  $C_{max}$  is the number of candidate compounds. The probability of at least one hit in  $m_i$  is a mighty hit is:

$$P_i = 1 - (1 - p)^{m_i}$$

Thereby the P\_Score of candidate compound  $c_i$  is calculated using the following equation:

$$P\_Score = \sqrt{-\log \left( \sum_{j=k_i}^n C_n^j \cdot P^j \cdot (1-P)^{n-j} \right)}$$

(3) **MD\_Score**: in the original pMatch algorithm, only the information of intensities and peak hits numbers is considered in scoring. In this work we introduce the MD\_Score, containing the information of matching distances between the real spectrum and *in-silico* spectrum (candidate compound), into the modified algorithm to improve identification performance. The weighted matching distance in candidate compound  $c_i$  is defined as:

$$w_i = \sum_{peaks\_in\_S_i} I_Q \cdot |m_Q - m_L|$$

where  $S_i$  is the peak hits set of  $c_i$ , variable  $I_Q$ ,  $m_Q$  and  $m_L$  are the real intensity, real  $m/z$  value, and explained *in-silico*  $m/z$  value of each peak in the  $S_i$ . The MD\_Score is calculated using the following equation:

$$MD\_Score = 1 - \frac{w_i - w_{min}}{w_{max} - w_{min}}$$

in which  $w_{min}$  and  $w_{max}$  are the minimum and maximum value of  $w_i$  in all the candidate compounds respectively.

(4) **Overall Similarity Score**: the final similarity score is defined as the product of SDP\_Score, P\_Score, and MD\_Score:

$$\text{Overall similarity score} = \text{SDP\_Score} \times \text{P\_Score} \times \text{MD\_Score}$$

The higher the overall score, the more similar the real spectrum is compared to the candidate *in-silico* spectrum (compound).

**Table S5:** Fragmentation spectra retrieved from MassBank (Horai, et al., 2010)

| Case Study                                         | Name                     | Unique Identifier<br>MassBank | Number<br>of Peaks | Record Title                                  |
|----------------------------------------------------|--------------------------|-------------------------------|--------------------|-----------------------------------------------|
| <b>Phenylalanine metabolism<br/>KEGG pathway</b>   | Acetyl-CoA               | KNA00207                      | 53                 | LC-ESI-ITFT; MS2; m/z:405.57; POS             |
|                                                    | Capsaicin                | WA001605                      | 15                 | LC-ESI-Q; MS; POS; 30 V                       |
|                                                    | Isobutyryl-CoA           | PR100154                      | 14                 | LC-ESI-QTOF; MS2; CE:30 V; [M+H] <sup>+</sup> |
|                                                    | N-Acetyl-L-phenylalanine | KO002200                      | 31                 | LC-ESI-QQ; MS2; CE:30 V; [M+H] <sup>+</sup>   |
|                                                    | Succinic acid            | KZ000074                      | 82                 | GC-EI-TOF; MS; 2 TMS; BP:147                  |
| <b>Top 200 prescribed drugs<br/>in USA in 2011</b> | Amoxicillin              | WA001751                      | 112                | LC-ESI-Q; MS; POS; 30 V                       |
|                                                    | Digoxin                  | WA000563                      | 71                 | LC-ESI-Q; MS; POS; 30 V                       |
|                                                    | Meloxicam                | WA002576                      | 12                 | LC-ESI-Q; MS; POS; 30 V                       |
|                                                    | Naproxen                 | WA000359                      | 13                 | LC-ESI-Q; MS; POS; 30 V                       |
|                                                    | Prednisone               | CO000368                      | 182                | LC-ESI-QTOF; MS2; CE:30 eV;                   |



**Table S6:** Results of the spectral matching using a mass tolerance (Tp) of 1 Da.

| Case Study/ <i>In-silico</i> library           | Name (Unique Identifier MassBank) * | Candidate <i>In-silico</i> Compounds ** | Overall Similarity Score | Explained Peaks (Percentage) | Total Distance (Absolute) |
|------------------------------------------------|-------------------------------------|-----------------------------------------|--------------------------|------------------------------|---------------------------|
| <b>Phenylalanine metabolism KEGG pathway</b>   | Acetyl-CoA (KNA00207)               | KGID_C00024                             | 0.06907                  | 48 (90.6%)                   | 7.007                     |
|                                                | Capsaicin (WA001605)                | KGID_C06866                             | 0.13561                  | 13 (86.7%)                   | 2.129                     |
|                                                | Isobutyryl-CoA (PR100154)           | KGID_C00630                             | 0.05078                  | 12 (85.7%)                   | 0.662                     |
|                                                | N-Acetyl-L-phenylalanine (KO002200) | KGID_C03519                             | 0.04375                  | 29 (93.5%)                   | 5.456                     |
|                                                |                                     | KGID_C05620                             | 0.04375                  | 29 (93.5%)                   | 5.456                     |
|                                                | Succinic acid (KZ000074)            | KGID_C00042                             | 0.02951                  | 31 (37.8%)                   | 4.263                     |
| <b>Top 200 prescribed drugs in USA in 2011</b> | Amoxicillin (WA001751)              | CSID_31006                              | 0.21531                  | 93 (83.0%)                   | 3.336                     |
|                                                | Digoxin (WA000563)                  | CSID_2006532                            | 0.17972                  | 42 (59.2%)                   | 9.460                     |
|                                                | Meloxicam (WA002576)                | CSID_10442740                           | 0.07393                  | 6 (50.0%)                    | 1.035                     |
|                                                | Naproxen (WA000359)                 | CSID_137720                             | 0.18800                  | 5 (38.5%)                    | 1.203                     |
|                                                | Prednisone (CO000368)               | CSID_5656                               | 1.81681                  | 175 (96.2%)                  | 17.199                    |
|                                                |                                     | CSID_4642486                            | 1.81681                  | 175 (96.2%)                  | 17.199                    |

\* Fragmentation spectra retrieved from MassBank (Horai, et al., 2010).

\*\* Includes all candidate *in-silico* compounds with an overall score larger than zero.

## References

- Horai, H., *et al.* (2010) MassBank: a public repository for sharing mass spectral data for life sciences, *Journal of Mass Spectrometry*, **45**, 703-714.
- Ye, D., *et al.* (2010) Open MS/MS spectral library search to identify unanticipated post-translational modifications and increase spectral identification rate, *Bioinformatics*, **26**, i399-406.
